# Supplementary material
Source: Royal Society of Chemistry journal article supplement (doi:10.1039/d6cc02106a)
Supplement: d6cc02106a1.pdf [file d6cc02106a1.pdf]

## Supporting Information

# Sulfate-Mediated Reactive Oxygen Chemistry for Photocatalytic Nitrogen Fixation

Xin Zhang, Linlin Zhang\*, Yaming Hu, Xue Li, Xuesheng Yang, Ping Wang, Hengxin Yu, Shiyu Song,  
Botao Zhang\*, Xin Ding\*

College of Chemistry and Chemical Engineering, Qingdao University, Qingdao, China

E-mail: zll@qddu.edu.cn; zhangbotao@qdu.edu.cn; dingxin@qdu.edu.cn

## Experimental Procedures

### Materials

Chemicals including Titanium tetrachloride ( $\text{TiCl}_4$ , 99.99%), Sodium carbonate ( $\text{NaCO}_3$ , 99.99%), Sodium bicarbonate ( $\text{NaHCO}_3$ , 99.99%), Sodium hydroxide ( $\text{NaOH}$ ), Salicylic acid ( $\text{C}_7\text{H}_6\text{O}_3$ , 99.99%), Trisodium citrate dihydrate ( $\text{C}_6\text{H}_5\text{Na}_3\text{O}_7 \cdot 2\text{H}_2\text{O}$ , 99.99%), Sodium hypochlorite aqueous solution ( $\text{NaClO}$ , 99.9%), Ethylene glycol ( $\text{C}_2\text{H}_6\text{O}_2$ , 99.99%), Ethyl alcohol ( $\text{C}_2\text{H}_5\text{OH}$ , 99.9%), Concentrated hydrochloric acid ( $\text{HCl}$ , 37.2%) and Concentrated sulfuric acid ( $\text{H}_2\text{SO}_4$ , 18%) were purchased from Aladdin Industrial Crop. All ultrapure water in this article is water with resistivity of  $18 \text{ M}\Omega \cdot \text{cm}$  ( $25^\circ \text{C}$ ).

### Synthesis of $\text{TiO}_2$ and S- $\text{TiO}_2$

**TiO<sub>2</sub>:** Titanium tetrachloride (1 ml) was dissolved into 100 ml Ethylene glycol and stir until transparent. Then, the solution was transferred to a 100 ml Teflon autoclave, which was further annealed at  $180^\circ \text{C}$  for 10 h hours. After cooling to ambient temperature,  $\text{TiO}_2$  was obtained after cleaned by ethanol and water.

**S-TiO<sub>2</sub>:** The obtained  $\text{TiO}_2$  was immersed in dilute sulfuric acid solution for 6 hours, then dried by centrifugation and ground. Finally, it was calcined at  $450^\circ \text{C}$  for 3 hours to yield S- $\text{TiO}_2$ .

### Characterizations

XRD patterns were recorded using  $\text{Cu K}\alpha$  radiation ( $\lambda=1.5406 \text{ \AA}$ ) over a  $2\theta$  range of  $10\text{-}80^\circ$ . HRTEM images were obtained on a transmission electron microscope operated at 200 kV. XPS measurements were performed with monochromatic  $\text{Al K}\alpha$  radiation (1486.6 eV), and binding energies were calibrated against the C 1s peak at 284.8 eV. In situ FTIR spectroscopy was performed on a Nicolet 6700 spectrometer equipped with a custom-built IR cell featuring two ZnSe windows for infrared transmission and a quartz window for light introduction. The Ir-WO<sub>3</sub> catalyst was placed in the cell, pretreated under Ar flow ( $10 \text{ mL} \cdot \text{min}^{-1}$ ) at 573 K or 673 K for 30 min, and background spectra were collected at 473 K with a resolution

of  $1 \text{ cm}^{-1}$ . After introducing  $\text{N}_2/\text{O}_2$  mixture gas (4:1), spectra were recorded in the dark for 5 min, followed by time-resolved measurements under light illumination at 0, 5, 10, 15, 20, 25 and 30 min to monitor the reaction process. Online mass spectrometry was conducted using a quadrupole mass spectrometer, monitoring characteristic ion fragments ( $m/z = 17, 30, 44, 46$ ) in multiple ion monitoring mode.

Under the optimal reaction conditions, simulated air was prepared with  $^{14}\text{N}_2$  and  $^{15}\text{N}_2$  as nitrogen sources respectively ( $V_{\text{N}_2}:V_{\text{O}_2} = 4:1$ , volume ratio) for photocatalytic reactions. After the reactions, the collected and processed solid products (mainly ammonium salts) were dissolved in dimethyl sulfoxide (DMSO) and adjusted to a concentration suitable for  $^1\text{H}$  NMR detection, resulting in test solutions containing  $^{14}\text{NH}_4^+$  and  $^{15}\text{NH}_4^+$  respectively. The ammonium ions were detected by  $^1\text{H}$  NMR, and the source of nitrogen in the products was confirmed by comparing the characteristic splitting patterns of  $^{14}\text{NH}_4^+$  (triplet) and  $^{15}\text{NH}_4^+$  (doublet).

## Gas pretreatment

Prior to entering the photocatalytic reactor, all gases were passed through a potassium permanganate solution and a dilute sulfuric acid solution to remove any possible impurities. Additionally, the reactor was subjected to three cycles of gas purging before the reaction commenced.

## Calculations

The generation rate of ammonium salt was calculated using Equation S1, where  $c(\text{NH}_4^+)$  represents the concentration of ammonium ions,  $V$  is the volume of the collected and processed liquid,  $t$  is the photocatalytic reaction time, and  $m_{\text{cat}}$  is the mass of the catalyst.

$$r_{(\text{NH}_4^+)} = \frac{C(\text{NH}_4^+) \times V \times 1000}{18 \times t \times m_{\text{cat}}} \quad (\text{S1})$$

Where:

$r_{(\text{NH}_4^+)}$ : is ammonia formation rate in  $\mu\text{mol h}^{-1} \text{ g}^{-1}_{\text{cat}}$ .

$C_{(\text{NH}_4^+)}$ : the concentration of ammonia in the collected solution in  $\mu\text{g mL}^{-1}$ .

$V$ : is the volume of production in mL.

$t$ : is light irradiation time.

$m_{\text{cat}}$ : is mass of catalyst.

**Table S1.** A comparison of the photocatalytic nitrogen fixation and ammonia synthesis performance of the photocatalysts reported in the literature.

| Catalyst                                                                 | Reaction atmosphere              | NH <sub>4</sub> <sup>+</sup> yield                                     | Ref.      |
|--------------------------------------------------------------------------|----------------------------------|------------------------------------------------------------------------|-----------|
| Fe/TiO <sub>2</sub>                                                      | Pure N <sub>2</sub> atmosphere   | 56.87 μmol h <sup>-1</sup> g <sup>-1</sup>                             | 1         |
| TiO <sub>2</sub> @LSM                                                    | Pure N <sub>2</sub> atmosphere   | 5.41 mg L <sup>-1</sup> g <sub>cat</sub> <sup>-1</sup> h <sup>-1</sup> | 2         |
| TiO <sub>2</sub> /ZrO <sub>2</sub><br>S-type heterojunctions             | Pure N <sub>2</sub> atmosphere   | 516.67 μmol h <sup>-1</sup> g <sup>-1</sup>                            | 3         |
| Pt//TiO <sub>2</sub>                                                     | Pure N <sub>2</sub> atmosphere   | 5114 μg·g <sup>-1</sup> ·h <sup>-1</sup>                               | 4         |
| TiO <sub>2</sub> (g-C <sub>3</sub> N <sub>4</sub> /TiO <sub>2</sub> -OV) | Pure N <sub>2</sub> atmosphere   | 31.6 μmol L <sup>-1</sup>                                              | 5         |
| TiO <sub>2</sub> -Mo10                                                   | Pure N <sub>2</sub> atmosphere   | 42.05 μmol·g <sup>-1</sup> ·h <sup>-1</sup>                            | 6         |
| F-Vo-TiO <sub>2</sub>                                                    | Pure N <sub>2</sub> atmosphere   | 206 μmol·h <sup>-1</sup> ·g <sup>-1</sup>                              | 7         |
| NTO-0.5                                                                  | Pure N <sub>2</sub> atmosphere   | 80.09 μmol g <sup>-1</sup> h <sup>-1</sup>                             | 8         |
| Ru-TiO <sub>2</sub>                                                      | Pure N <sub>2</sub> atmosphere   | 38.7 μmol g <sup>-1</sup> h <sup>-1</sup>                              | 9         |
| Fe-WO <sub>3</sub>                                                       | Simulated air                    | 477 μg g <sub>cat</sub> <sup>-1</sup> h <sup>-1</sup>                  | 10        |
| Bi-MOF/CN                                                                | Simulated air/ sacrificial agent | 209.96 μmol h <sup>-1</sup> g <sub>cat</sub> <sup>-1</sup>             | 11        |
| MXene/TiO <sub>2</sub> /Co-0.5%                                          | N <sub>2</sub> and air ambient   | 110 μmol g <sup>-1</sup> h <sup>-1</sup>                               | 12        |
| S-TiO <sub>2</sub>                                                       | Simulated air                    | 217.24 μmol h <sup>-1</sup> g <sub>cat</sub> <sup>-1</sup>             | This work |

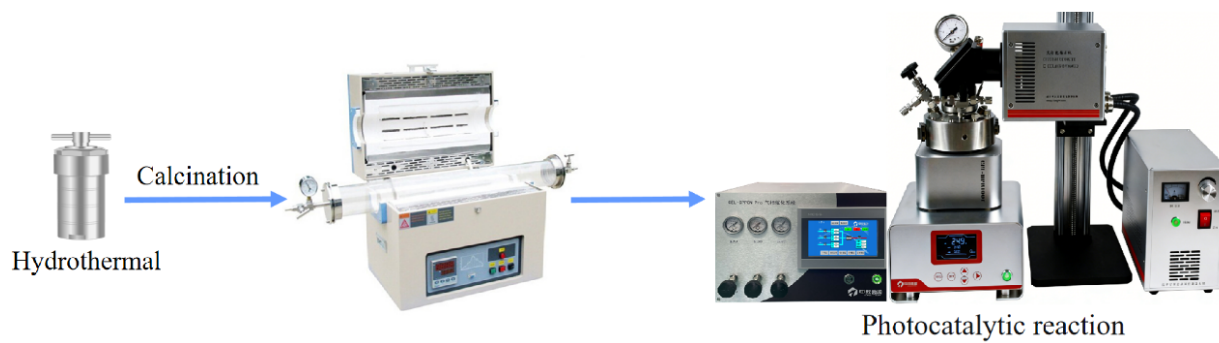

**Scheme S1.** Preparation process of S-TiO<sub>2</sub> and schematic diagram of the reaction setup.

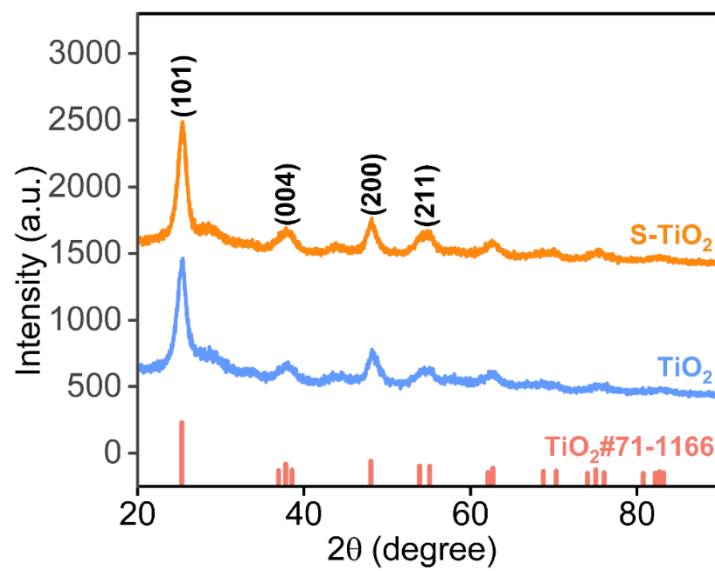

**Fig. S1.** XRD images of TiO<sub>2</sub> and S-TiO<sub>2</sub>.

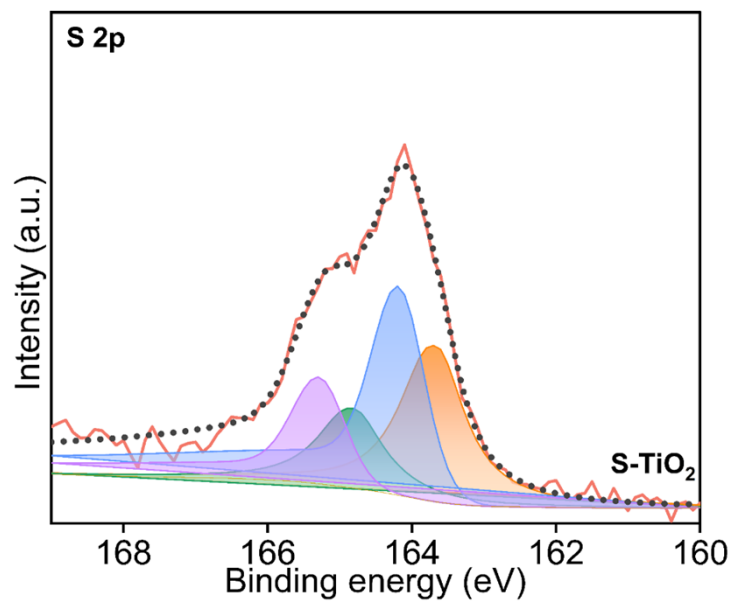

**Fig. S2.** XPS images of S 2p of S-TiO<sub>2</sub>.

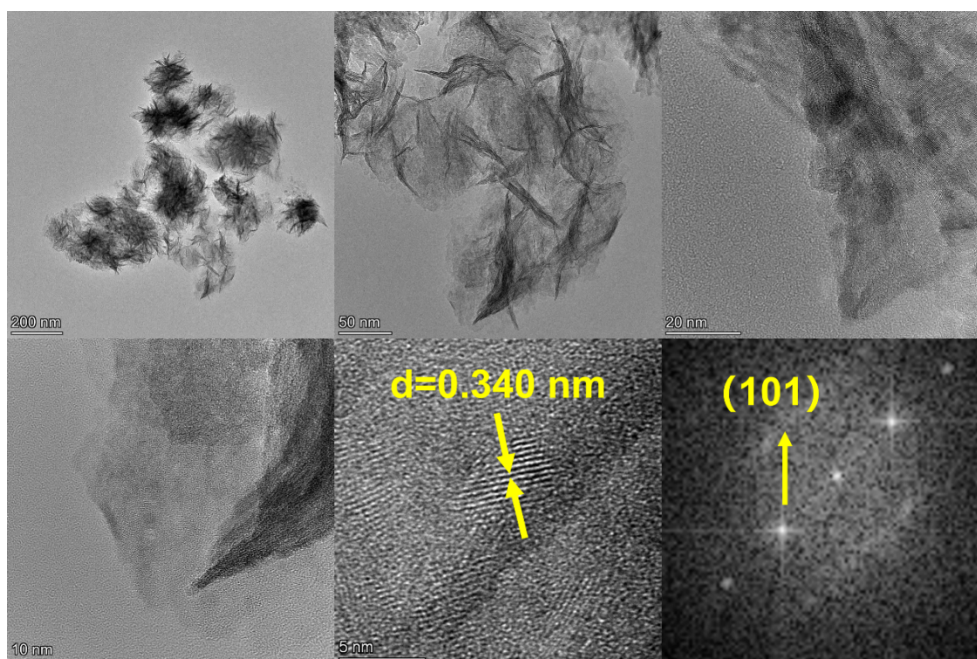

**Fig. S3.** HR-TEM images of TiO<sub>2</sub>.

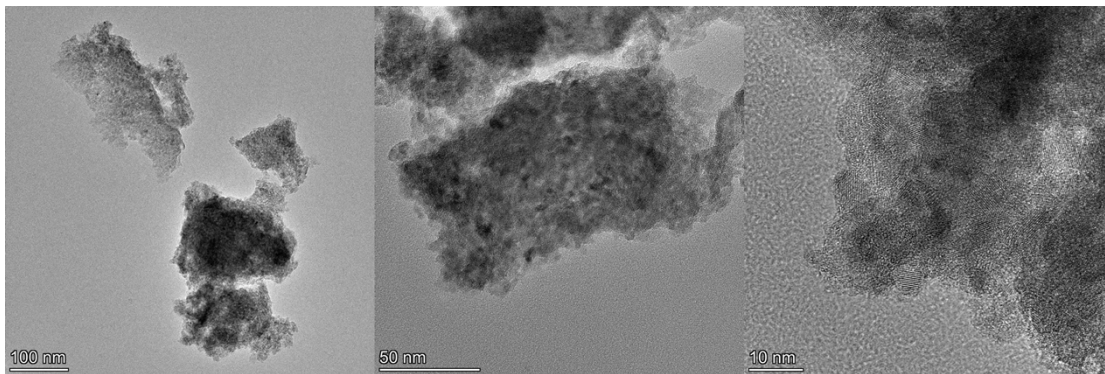

**Fig. S4.** HR-TEM images of S-TiO<sub>2</sub>.

**Table 2.** ICP-OES Elemental Analysis Results for S-TiO<sub>2</sub> (Mass Fraction).

| Sample             | Element | Weight percent (wt%) |
|--------------------|---------|----------------------|
| S-TiO <sub>2</sub> | S       | 1.9908%              |
|                    | Ti      | 47.0317%             |

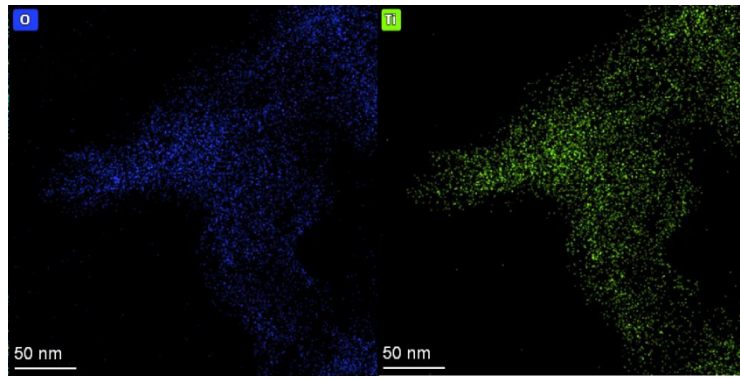

**Fig. S5.** EDS images of TiO<sub>2</sub>.

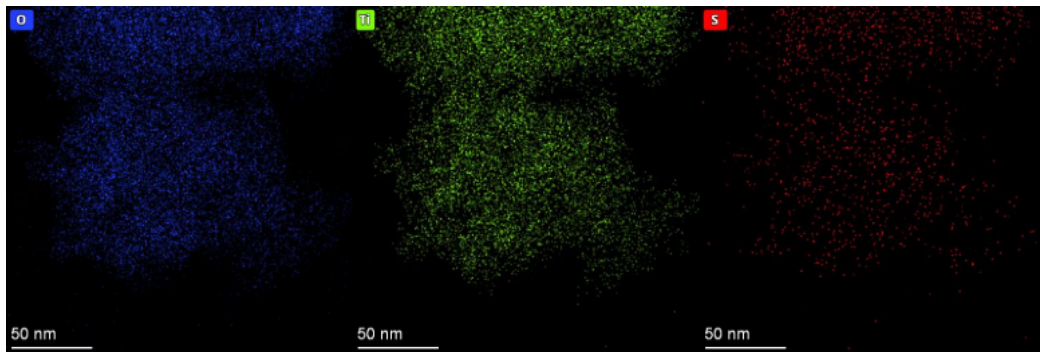

**Fig. S6** EDS images of S-TiO<sub>2</sub>

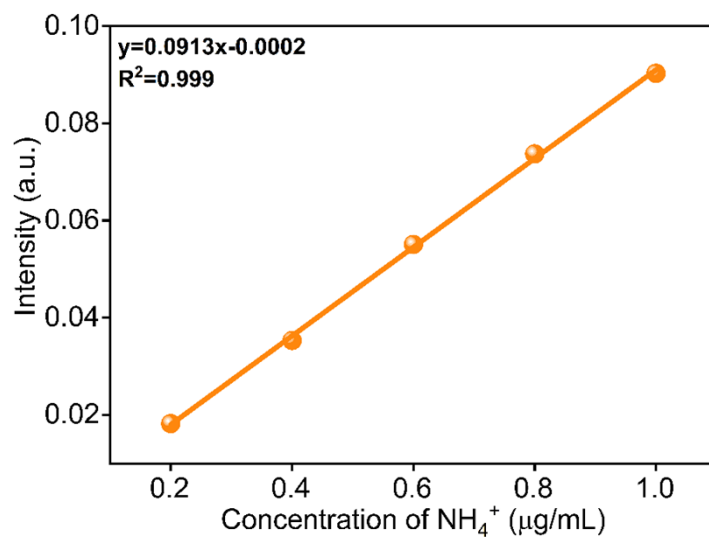

**Fig. S7** Plots of the fitting of IC area-concentration curves for different  $\text{NH}_4^+$  standard solutions.

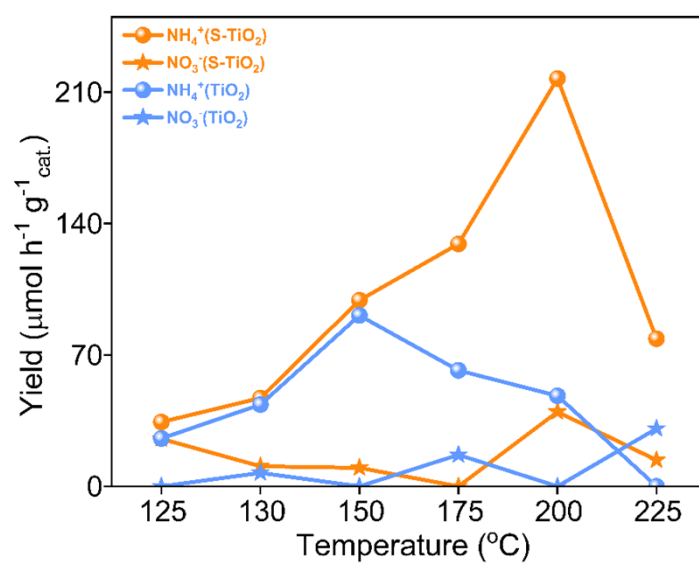

**Fig. S8** Temperature-dependent  $\text{NH}_4^+$  and  $\text{NO}_3^-$  production rates over  $\text{TiO}_2$  and pristine S- $\text{TiO}_2$  photocatalysts.

**Table S3.** Control experiments for photocatalytic N<sub>2</sub> fixation.

| Conditions                                                   | Dark | No-catalyst | Argon-only |
|--------------------------------------------------------------|------|-------------|------------|
| Yield ( $\mu\text{mol h}^{-1} \text{g}^{-1}_{\text{cat.}}$ ) | 0    | 0           | 0          |

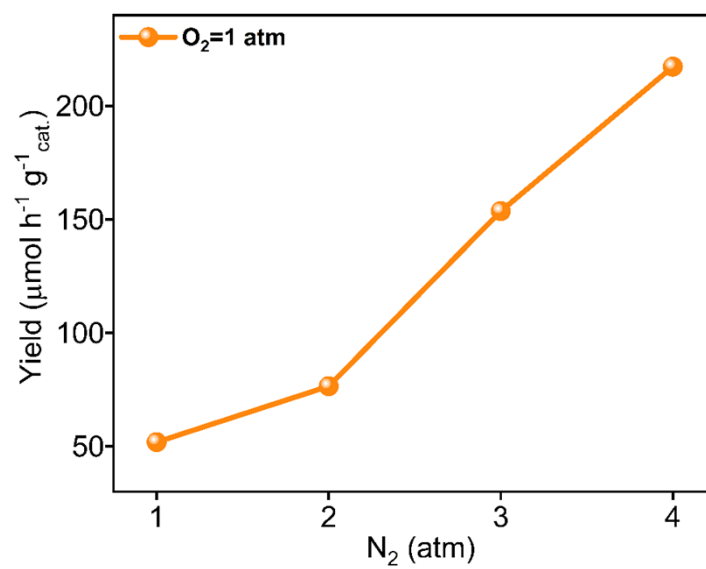

**Fig. S9** Ammonia yield at different nitrogen pressures.

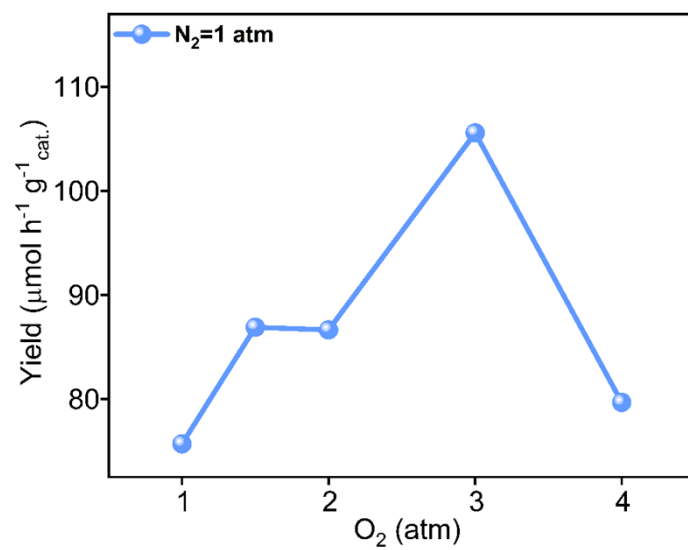

**Fig. S10** Ammonia yield at different oxygen pressures.

## References

1. H. Yang, G. Ren, Z. Li, Z. Zhang and X. Meng, *Applied Catalysis B: Environment and Energy*, 2024, **347**, 123795.
2. K.-C. Ma, H.-Y. Lin, Y.-C. Chen, C.-H. Tsai, K.-H. Zheng and J. M. Wu, *Journal of Materials Chemistry A*, 2024, **12**, 26866-26876.
3. A. S. C. Lazuli, R. Manju, M. Anpo and B. Neppolian, *Fuel*, 2026, **406**, 136889.
4. D. Lei, J. Liu, X. Zhang, G. Wang, Y. Wang and R. Fu, *Green Chemistry*, 2025, **27**, 13658-13666.
5. J. Zhu, K. Li, N. Liu, Q. Xu and M. Ji, *Catalysts*, 2024, **15**, 19.
6. W. Ding, Y. Yang, X. Li, S. Yuan, R. Shi, Z. Liu and M. Luo, *Langmuir*, 2024, **41**, 340-349.
7. R. Guan, D. Wang, Y. Zhang, C. Liu, W. Xu, J. Wang, Z. Zhao, M. Feng, Q. Shang and Z. Sun, *Applied Catalysis B: Environmental*, 2021, **282**, 119580.
8. C. Li, M. Gu, M. Gao, K. Liu, X. Zhao, N. Cao, J. Feng, Y. Ren, T. Wei and M. Zhang, *Journal of Colloid and Interface Science*, 2022, **609**, 341-352.
9. Y. Yue, Y. Jin, X. Yan, X. Hou, H. Ou, Q. Huang, H. Hu and G. Yang, *Chemical Engineering Science*, 2025, **304**, 121071.
10. Y. Shen, J. Shou, L. Chen, W. Han, L. Zhang, Y. Chen, X. Tu, S. Zhang, Q. Sun and Y. Chang, *Applied Catalysis A: General*, 2022, **643**, 118739.
11. L. Zhang, X. Zhou, S. Liu, H. Liu, S. Zhu, Y. Mao, Q. Yang, S. Zhu, C. Zhang and T. Wang, *Journal of Cleaner Production*, 2023, **425**, 138912.
12. W. Gao, X. Li, S. Luo, Z. Luo, X. Zhang, R. Huang and M. Luo, *Journal of Colloid and Interface Science*, 2021, **585**, 20-29.
